# Supplementary material
Source: publisher figshare collection journal article supplement (https://tandf.figshare.com/ndownloader/files/20115569)
Supplement: Supplementary file 1 [file 20115569]

Table S1. List of complete mitochondrial genomes for bioinformatics analyses in this study

| Sample /GenBank No. | Taxa | Geographic origin | Haplotype | Reference |
| --- | --- | --- | --- | --- |
| SLT-1  KX554925  KX554926  KX554927  KX554928  KX554929  KX554930  KU666462  KU666463  KU666464  KU666465  EF507798  EF507799  NC_009628  EF212037  KU666460  KU666461  AP003423  EF212038  EF507800  EF507801  NC_009629  KU666451  KU666452  KU666453  KU666454  KU666455  KU666456  KU666457  KU666458  KU666459  EU159113  NC_009849  KU605077  KU605073  KU605074  KU605075  KU605072  KU605076  KU605079  KU605080  KX554931  KX554932  KX554933  KX554934  JN632608  KU605059  KU605061  KU605071  FJ456892  EU681954  AP003426  NC_002504  KT182635 | *C. bactrianus*  *C. bactrianus*  *C. bactrianus*  *C. bactrianus*  *C. bactrianus*  *C. bactrianus*  *C. bactrianus*  *C. bactrianus*  *C. bactrianus*  *C. bactrianus*  *C. bactrianus*  *C. bactrianus*  *C. bactrianus*  *C. bactrianus*  *C. bactrianus*  *C. bactrianus*  *C. bactrianus*  *C. bactrianus*  *C. ferus*  *C. ferus*  *C. ferus*  *C. ferus*  *C. ferus*  *C. ferus*  *C. ferus*  *C. ferus*  *C. ferus*  *C. ferus*  *C. ferus*  *C. ferus*  *C. ferus*  *C. dromedarius*  *C. dromedarius*  *C. dromedarius*  *C. dromedarius*  *C. dromedarius*  *C. dromedarius*  *C. dromedarius*  *C. dromedarius*  *C. dromedarius*  *C. dromedarius*  *C. dromedarius*  *C. dromedarius*  *C. dromedarius*  *C. dromedarius*  *C. dromedarius*  *C. dromedarius*  *C. dromedarius*  *C. dromedarius*  *V. vicugna*  *L. guanicoe*  *L. glama*  *L. pacos*  *E. asinus* | Shaanxi,China  Iran  Iran  Iran  Iran  Iran  Iran  Mongolia  Mongolia  Mongolia  Mongolia  Mongolia  Mongolia  Inner Mongolia,China  Inner Mongolia,China  Austria  Kazakhstan  Japan  Mongolia  Mongolia  Mongolia  Mongolia  Mongolia  Mongolia  Mongolia  Mongolia  Mongolia  Mongolia  Mongolia  Mongolia  Mongolia  Emirate of Dubai  Emirate of Dubai  Emirate of Dubai  Saudi Arabia  Saudi Arabia  Saudi Arabia  Qatar  Austria  Sudan  Pakistan  Iran  Iran  Iran  Iran  Morocco  Syria  Jordan  Turkey  Argentina  Argentina  Japan  Sweden  Yunnan,China | MH1&CH1  MH15&CH15  MH11&CH15  MH16&CH16  MH12&CH15  MH13&CH14  MH14&CH15  MH2&CH3  MH2&CH3  MH5&CH9  MH6&CH11  MH10&CH12  MH8&CH8  MH9&CH12  MH9&CH12  MH7&CH11  MH4&CH5  MH3&CH2 | This study  【Tahmoorespur et al, 2014】  【Tahmoorespur et al, 2014】  【Tahmoorespur et al, 2014】  【Tahmoorespur et al, 2014】  【Tahmoorespur et al, 2014】  【Tahmoorespur et al, 2014】  【Mohandesan et al, 2017 a】  【Mohandesan et al, 2017 a】  【Mohandesan et al, 2017 a】  【Mohandesan et al, 2017 a】  【Ji et al, 2009】  【Ji et al, 2009】  【Ji et al, 2009】  【Cui et al, 2007】  【Mohandesan et al, 2017 a】  【Mohandesan et al, 2017 a】  【Lin et al, 2001】  【Cui et al, 2007】  【Ji et al, 2009】  【Ji et al, 2009】  【Ji et al, 2009】  【Mohandesan et al, 2017 a】  【Mohandesan et al, 2017 a】  【Mohandesan et al, 2017 a】  【Mohandesan et al, 2017 a】  【Mohandesan et al, 2017 a】  【Mohandesan et al, 2017 a】  【Mohandesan et al, 2017 a】  【Mohandesan et al, 2017 a】  【Mohandesan et al, 2017 a】  Unpublished  Unpublished  【Mohandesan et al, 2017 a】  【Mohandesan et al, 2017 a】  【Mohandesan et al, 2017 a】  【Mohandesan et al, 2017 a】  【Mohandesan et al, 2017 a】  【Mohandesan et al, 2017 a】  【Mohandesan et al, 2017 a】  【Mohandesan et al, 2017 a】  【Tahmoorespur et al, 2014】  【Tahmoorespur et al, 2014】  【Tahmoorespur et al, 2014】  【Tahmoorespur et al, 2014】  【Hassanin et al, 2012】  【Mohandesan et al, 2017 b】  【Mohandesan et al, 2017 b】  【Mohandesan et al, 2017 b】  【Di et al, 2010】  【Di et al, 2010】  【Lin et al, 2001】  【Ursing et al, 2000】  【Sun et al, 2015】 |

Table S2. List of cyt *b* gene sequences of *C. bactrianus* for network analyses in this study

| GenBank No. | Geographic origin | Haplotype | Reference |
| --- | --- | --- | --- |
| FJ171716  FJ171714  FJ171711  FJ171706  FJ171702  AY126620  AY126621  AY126622  AY126619  FJ171705  FJ171708  CBU06427 | Inner Mongolia,China  Inner Mongolia,China  Inner Mongolia,China  Inner Mongolia,China  Inner Mongolia,China  Gansu,China  Gansu,China  Gansu,China  Mongolia  Xinjiang,China  Xinjiang,China  Peru | CH12  CH13  CH11  CH11  CH11  CH7  CH6  CH11  CH4  CH10  CH11  CH2 | 【Ji et al, 2009】  【Ji et al, 2009】  【Ji et al, 2009】  【Ji et al, 2009】  【Ji et al, 2009】  【Jianlin et al, 2004】  【Jianlin et al, 2004】  【Jianlin et al, 2004】  【Jianlin et al, 2004】  【Ji et al, 2009】  【Ji et al, 2009】  【Stanley et al, 1994】 |
